# Supplementary material
Source: PubMed Central journal article supplement (PMC2897650)
Supplement: supp_192_13_3294__1.pdf [file supp_192_13_3294__1.pdf]

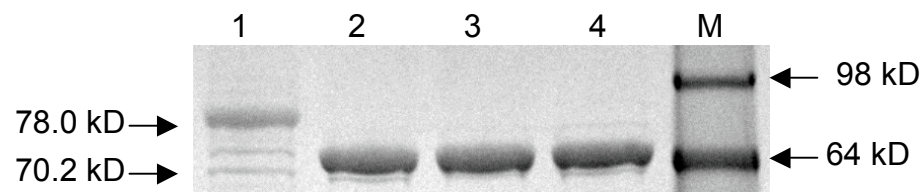

**Fig. S1.** Purified recombinant proteins for Phospholipase A<sub>2</sub> assay. Imperial Protein Stained (Pierce) 4 to 20 % Tris-glycine precast gel (Invitrogen) using 1XTris-glycine-SDS running buffer (BioRad). Purified recombinant proteins (including C-terminal *myc* epitope and 6XHis tag) expressed in *E. coli* TOP10 cells shown, Lane1: ExoU (78.0 kD from pTrc-ExoU), Lane2: S86A (70.2 kD from pTrc-S86A), Lane3: S86A-D250A (70.2 kD from pTrc-S86A-D250A) and Lane4: RT0522 (70.2 kD from pTrc-522HS), LaneM: SeeBlue Plus2 prestained protein standard (Invitrogen).

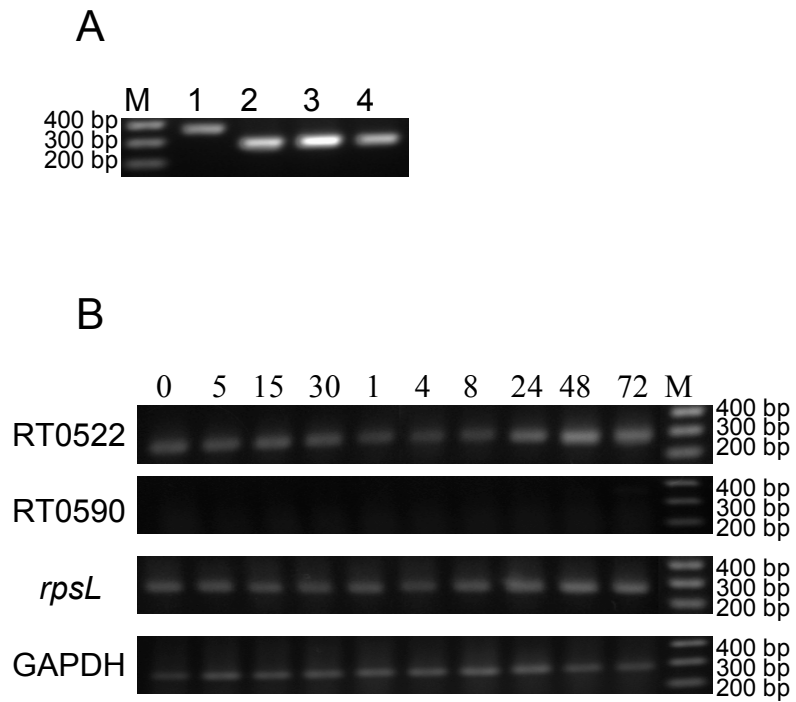

**Fig. S2.** Ethidium bromide-stained 1% agarose gel in 1X TAE buffer. Panel A: PCR of genomic DNA isolated from *R. typhi* infected Vero76 cells using primer pairs specific to Lane1: 365 bp of RT0590, Lane2: 282 bp of RT0522, Lane3: 284 bp of *rpsL* (RT0119) and Lane 4: 283 bp of GAPDH. Panel B: Products of qRT-PCR on RNA isolated at different stage of growth: 0 min, 5 min, 15 min, 30 min, 1 hr, 4 hr, 8 hr, 24 hr, 48 hr and 72 hr. M: Marker.

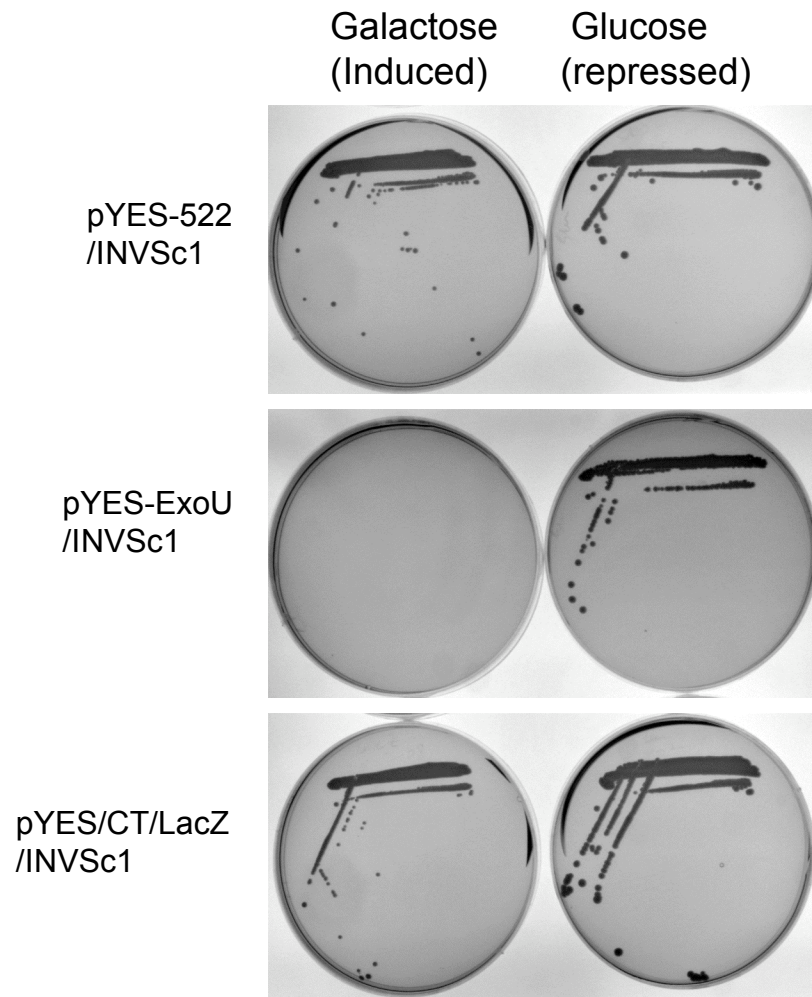

**Fig. S3.** Cytotoxicity assay in yeast strain INVSc1 transformed with the plasmids: pYES-522 (carrying RT0522), pYES-ExoU (carrying ExoU as positive control) or pYES2/CT/LacZ (control plasmid). Transformed yeast cells were streaked onto inducing (SC-U+Gal) or repressing (SC-U+Glu ) agar and incubated at 30°C for 3 days.
